# Supplementary material for: Calycosin Suppresses RANKL-Mediated Osteoclastogenesis through Inhibition of MAPKs and NF-κB
Source: PubMed Central journal article supplement (PMC4691122; doi:10.3390/ijms161226179), 2015-12-10
Supplement: ijms-16-26179-s001.pdf [file ijms-16-26179-s001.pdf]

# Supplementary Material: Calycosin Suppresses RANKL-Mediated Osteoclastogenesis through Inhibition of MAPKs and NF- $\kappa$ B

Gui-Hua Quan, Hongbing Wang, Jinjin Cao, Yuxin Zhang, Donglin Wu, Qisheng Peng, Ning Liu and Wan-Chun Sun

NMR Spectrum and MS Data for Calycosin

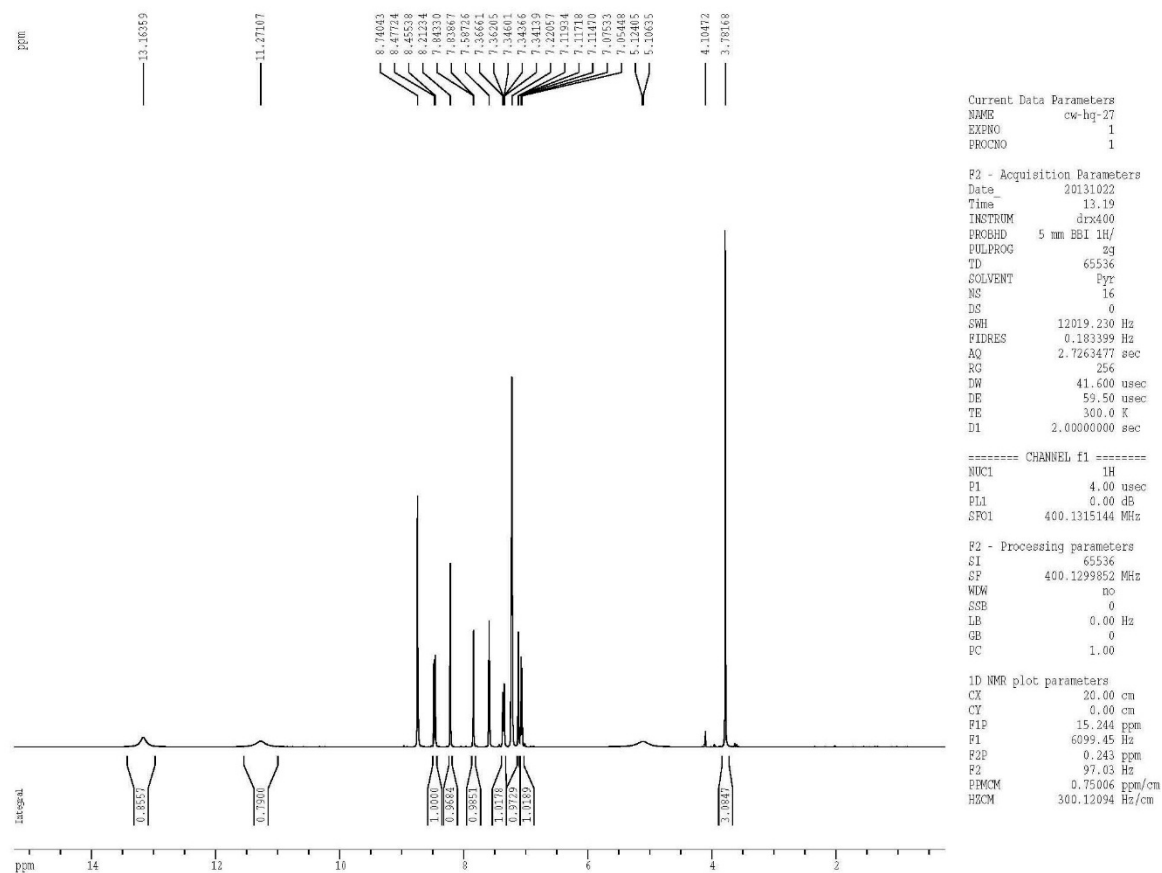

Figure S1. <sup>1</sup>H-NMR (400 MHz, pyridine-d<sub>5</sub>) spectrum of calycosin.

cw-hq-27

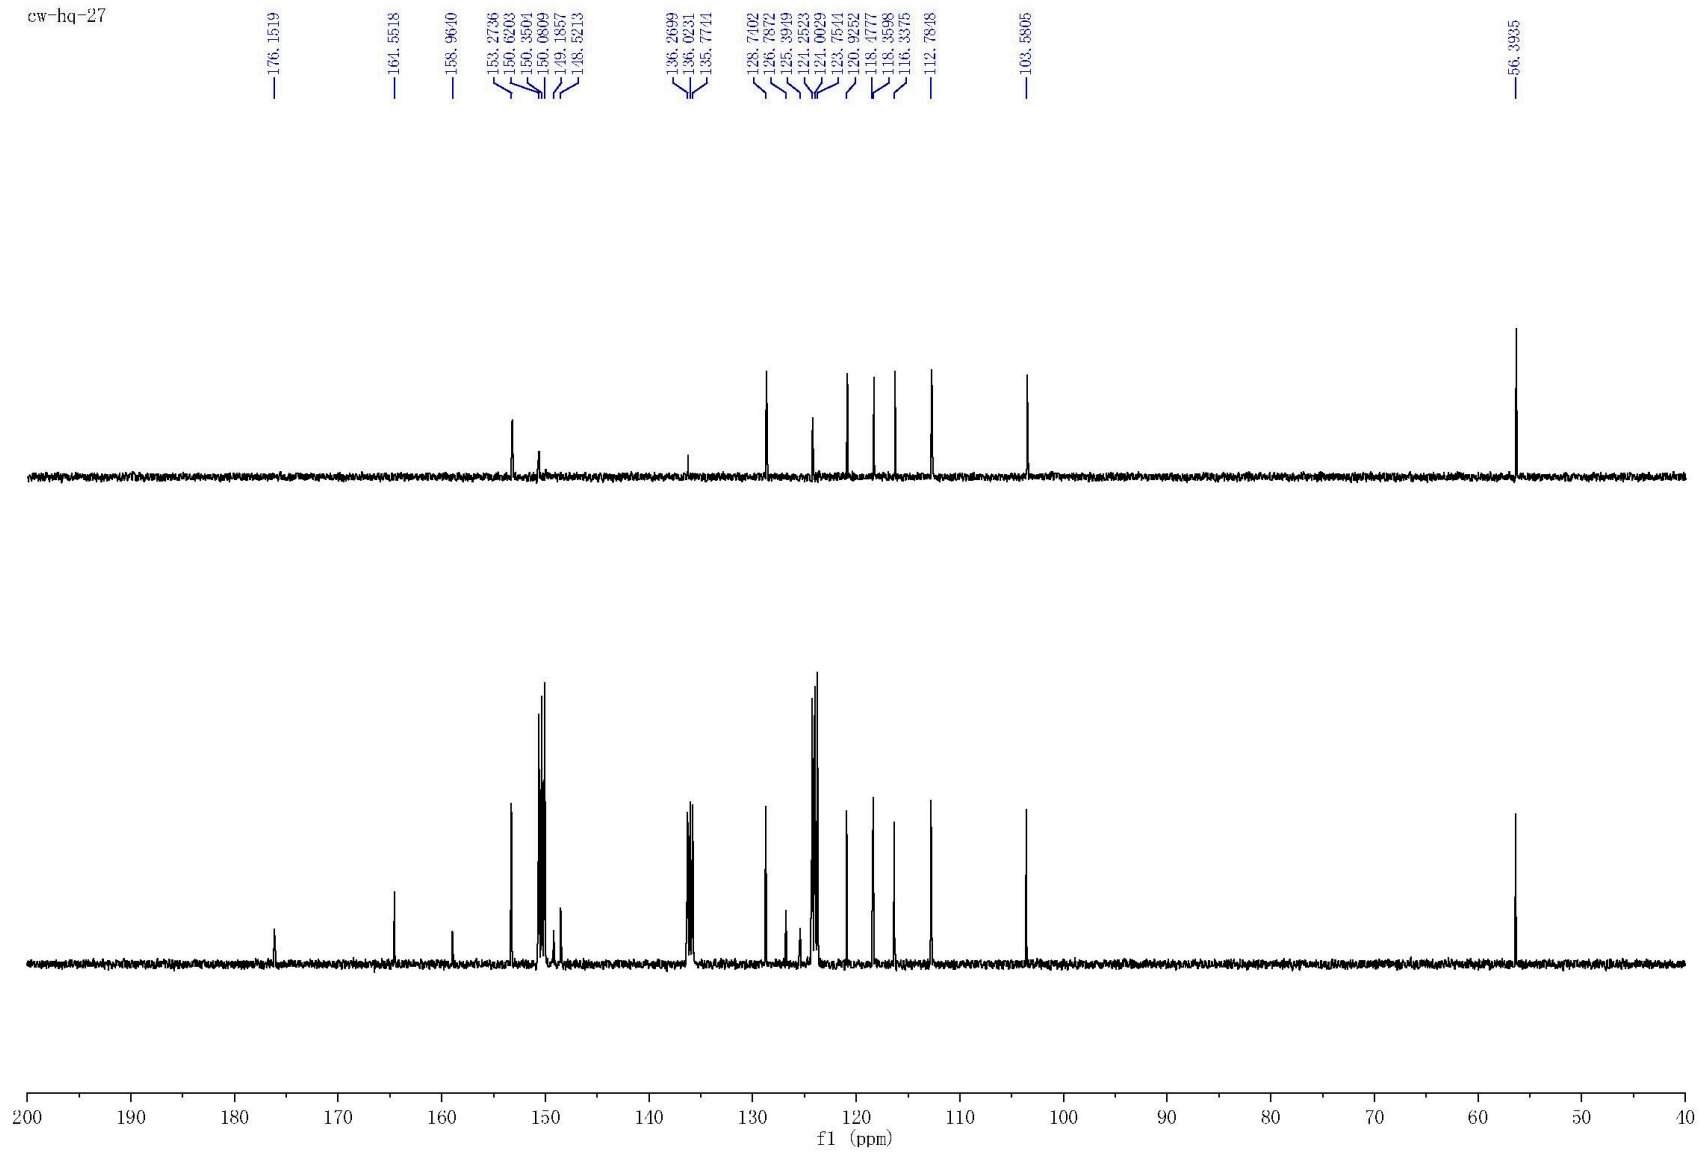

Figure S2.  $^{13}\text{C}$ -NMR (100 MHz, pyridine- $d_5$ ) spectrum of calycosin.

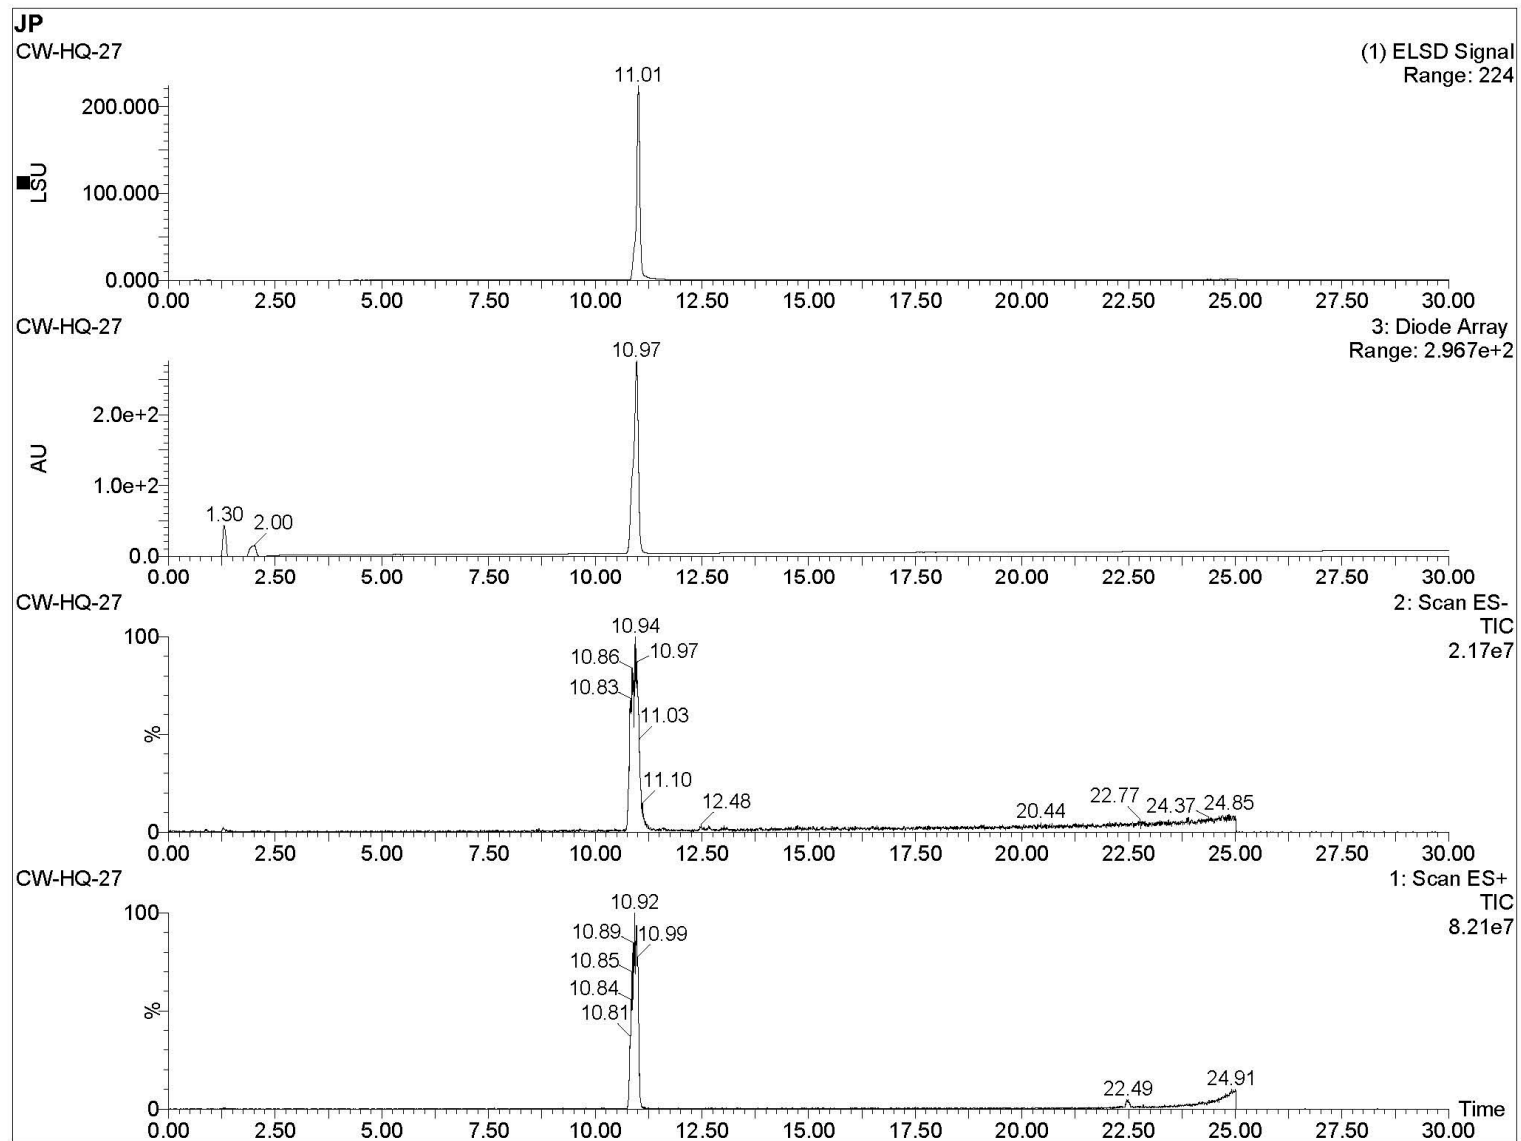

Figure S3. Cont.

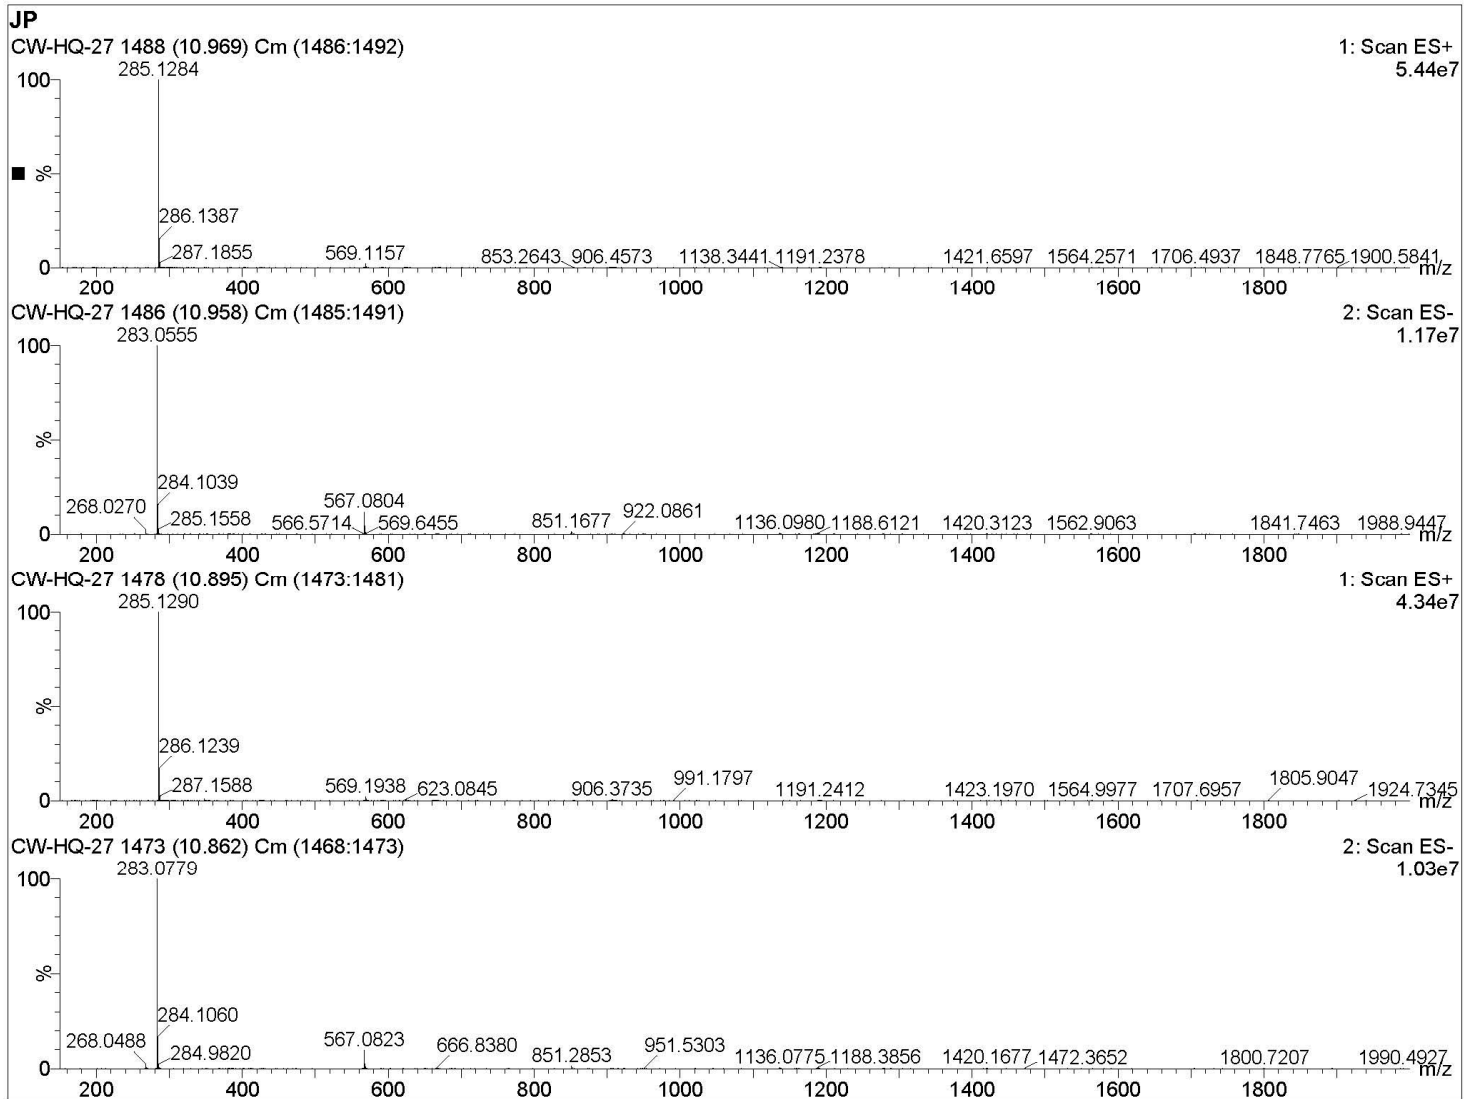

Figure S3. LC-MS spectrum of calycosin.
